# Supplementary material
Source: MDPI journal article supplement (https://www.mdpi.com/2071-1050/15/7/5902)
Supplement: s1 [file s1]

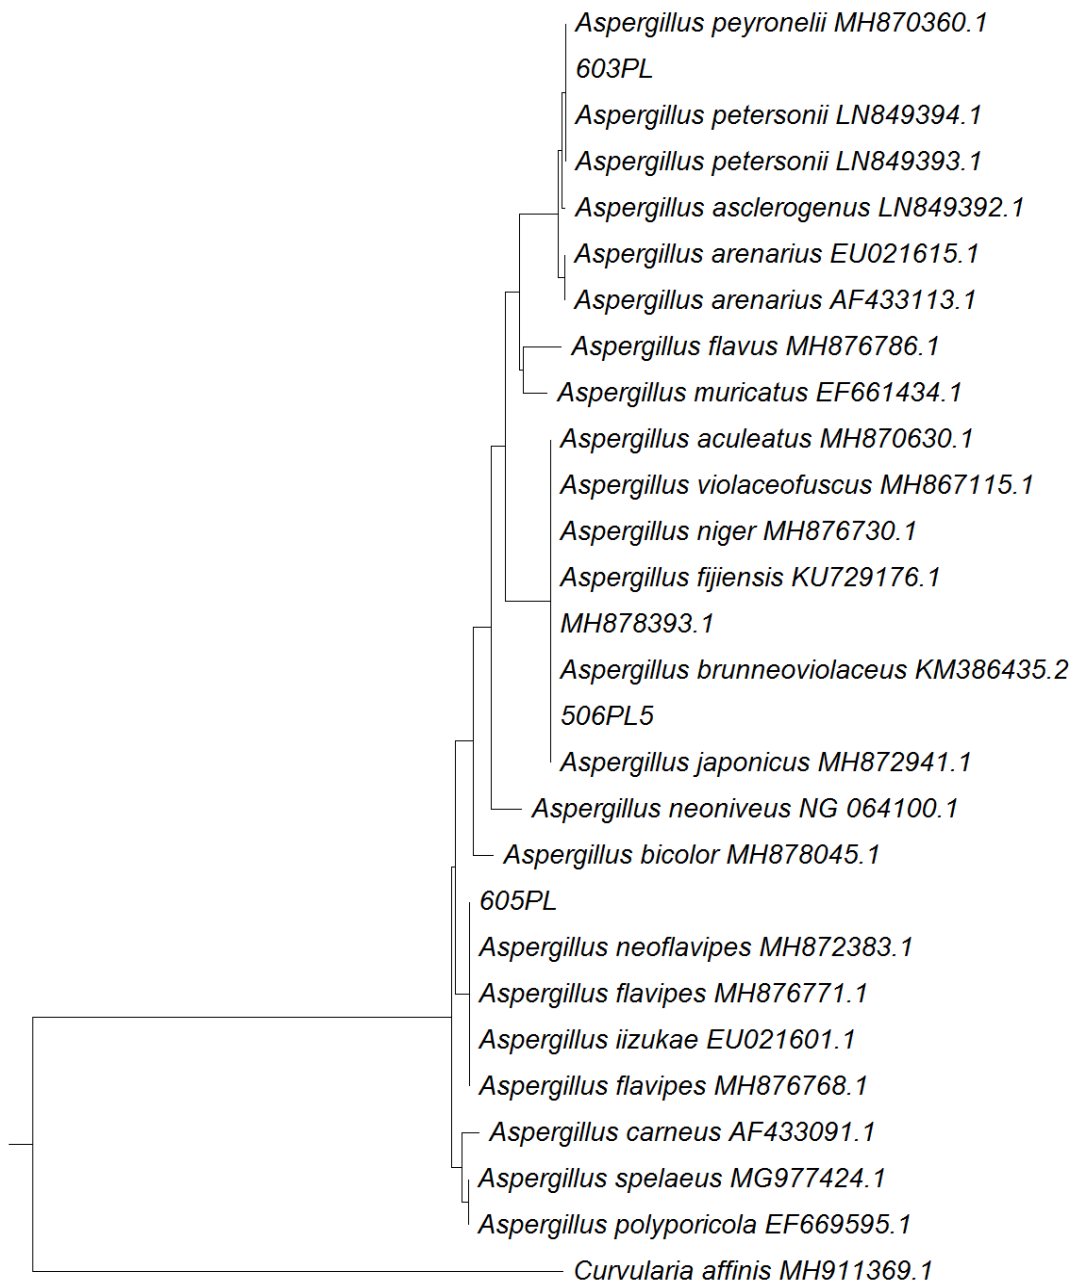

50

(a)

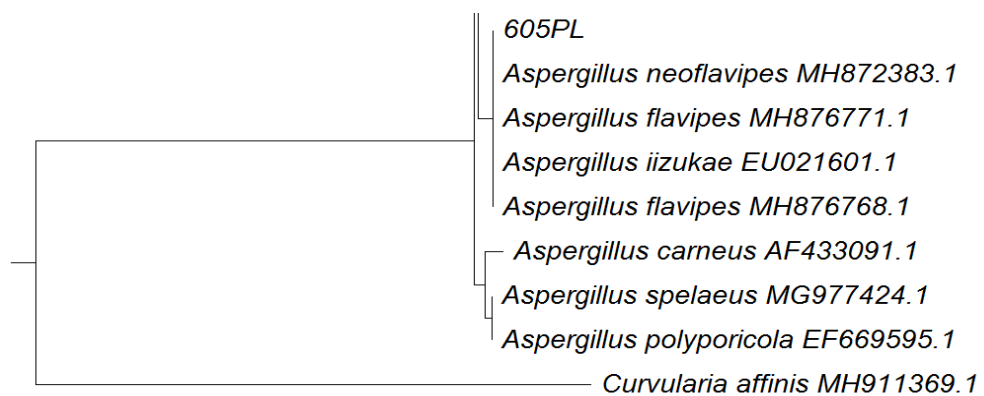

(b)

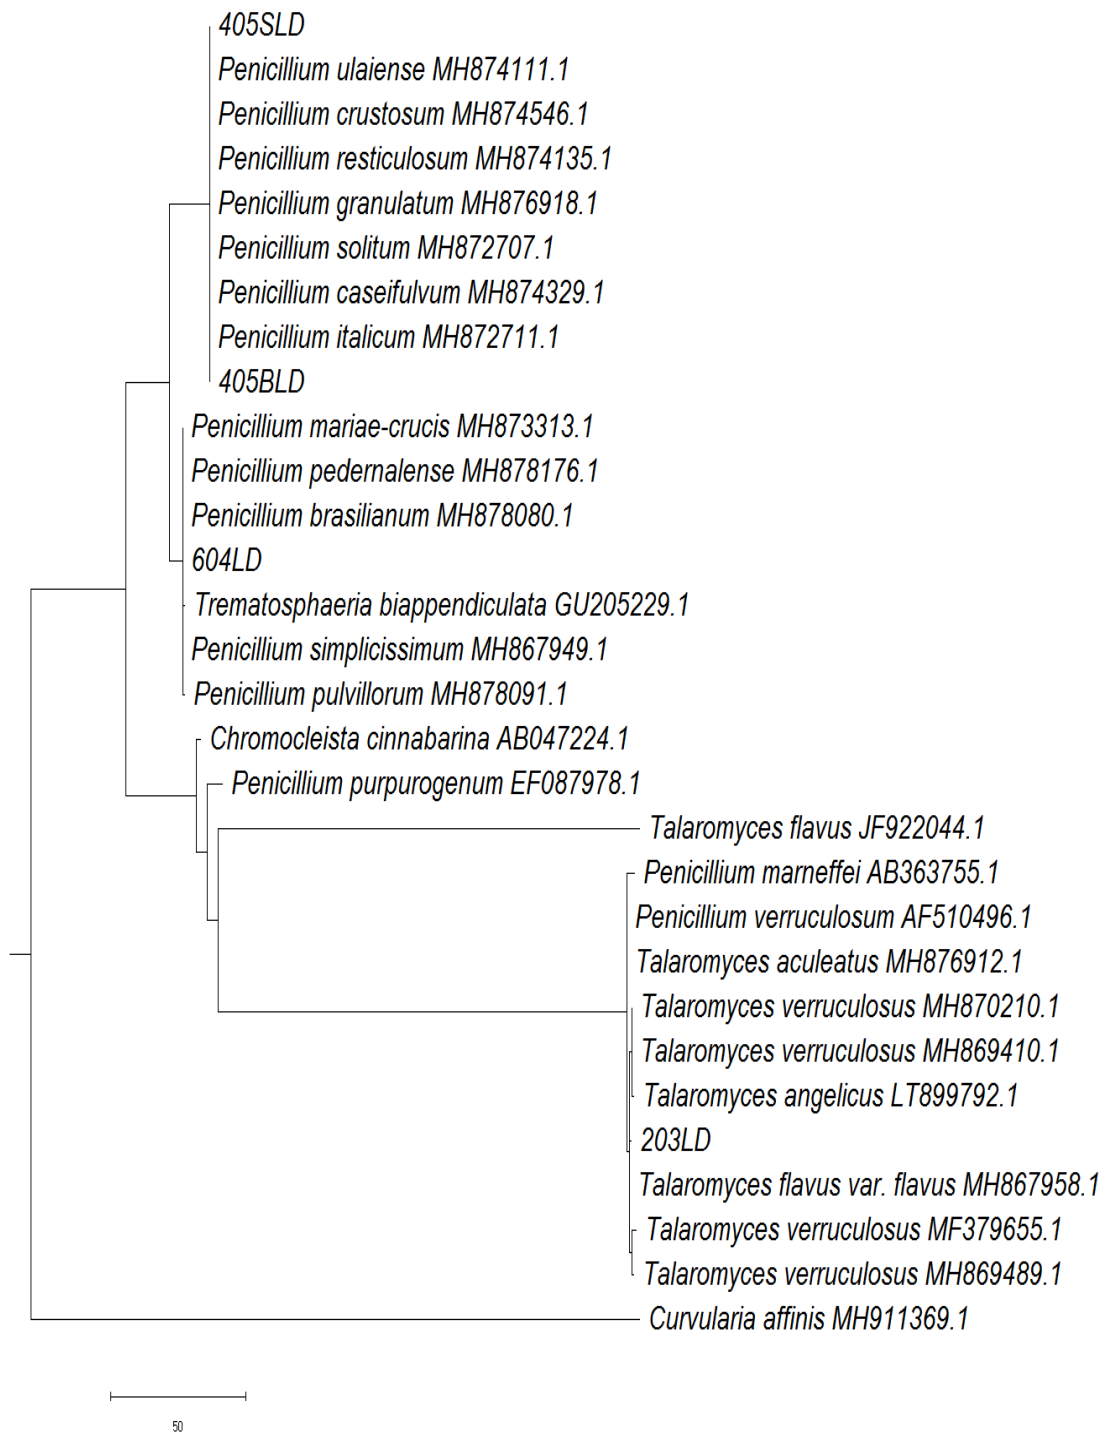

(c)

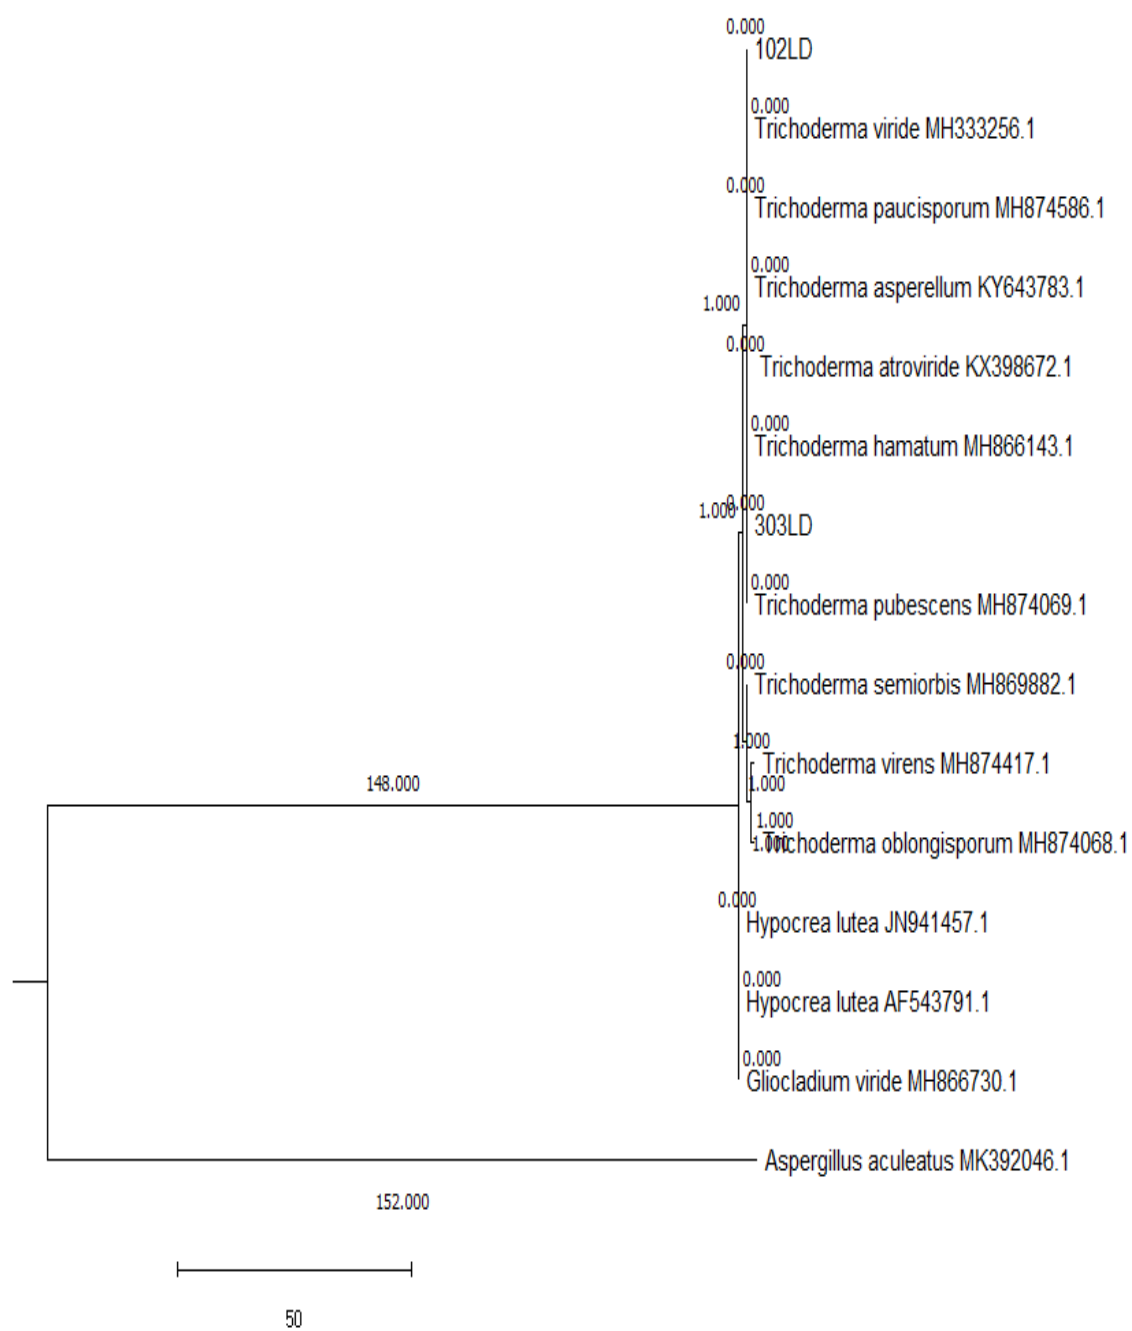

(d)

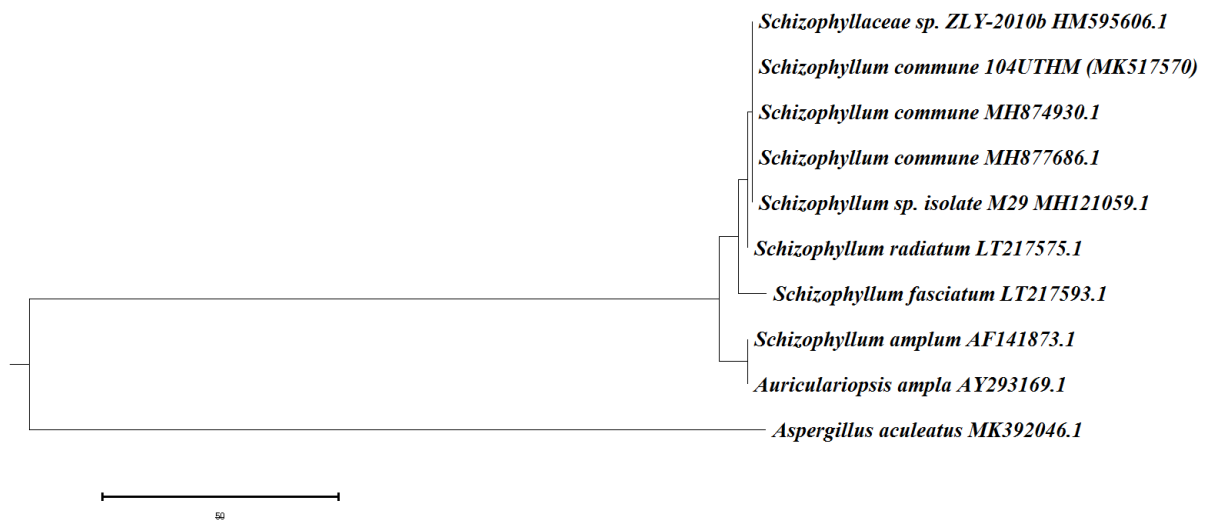

(e)

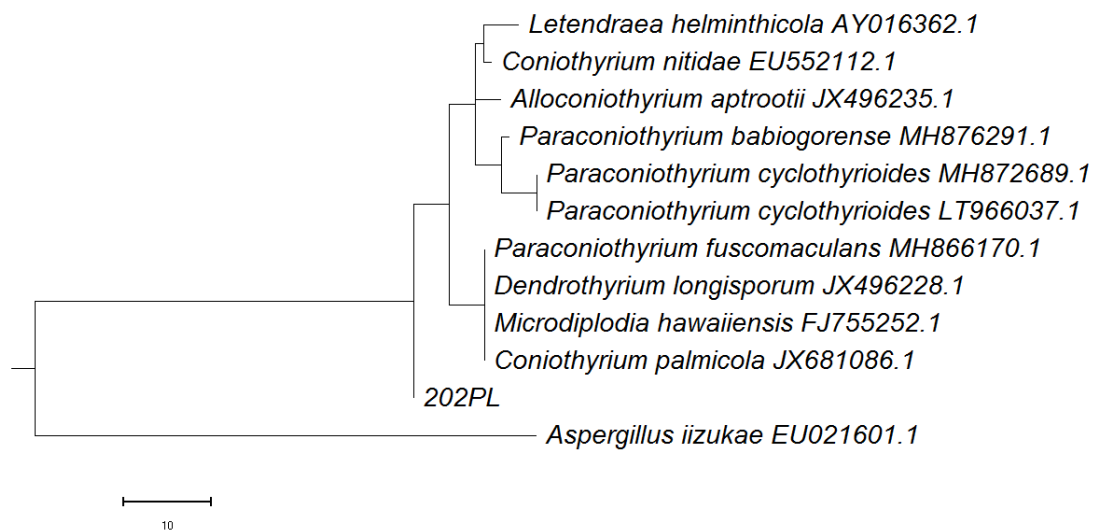

(f)

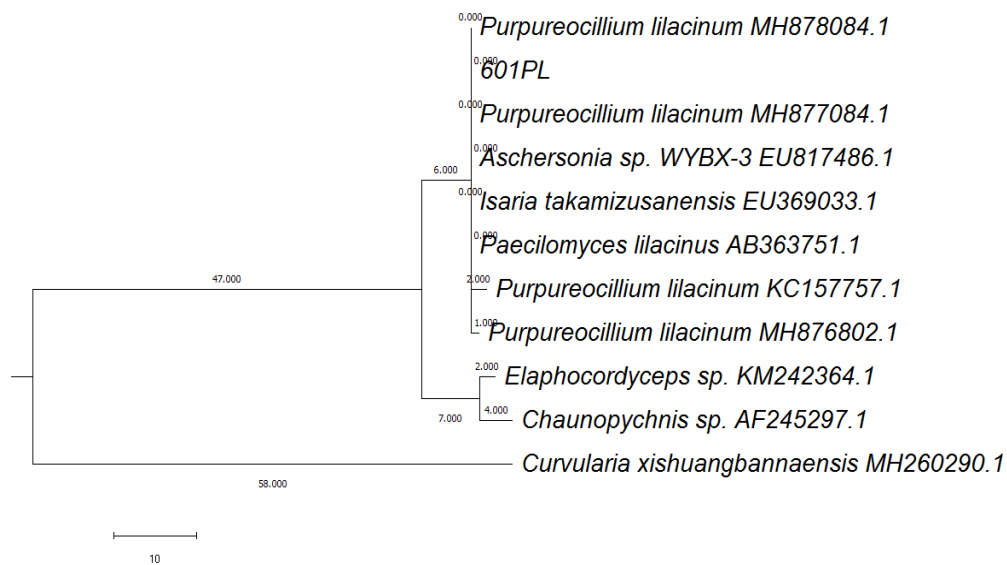

(g)

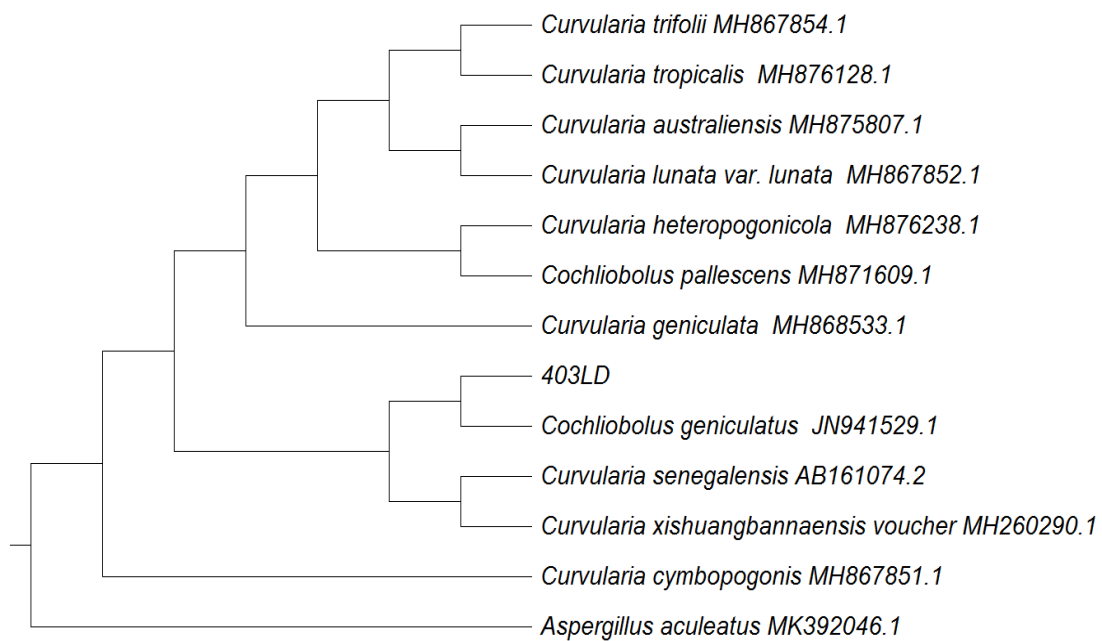

(h)

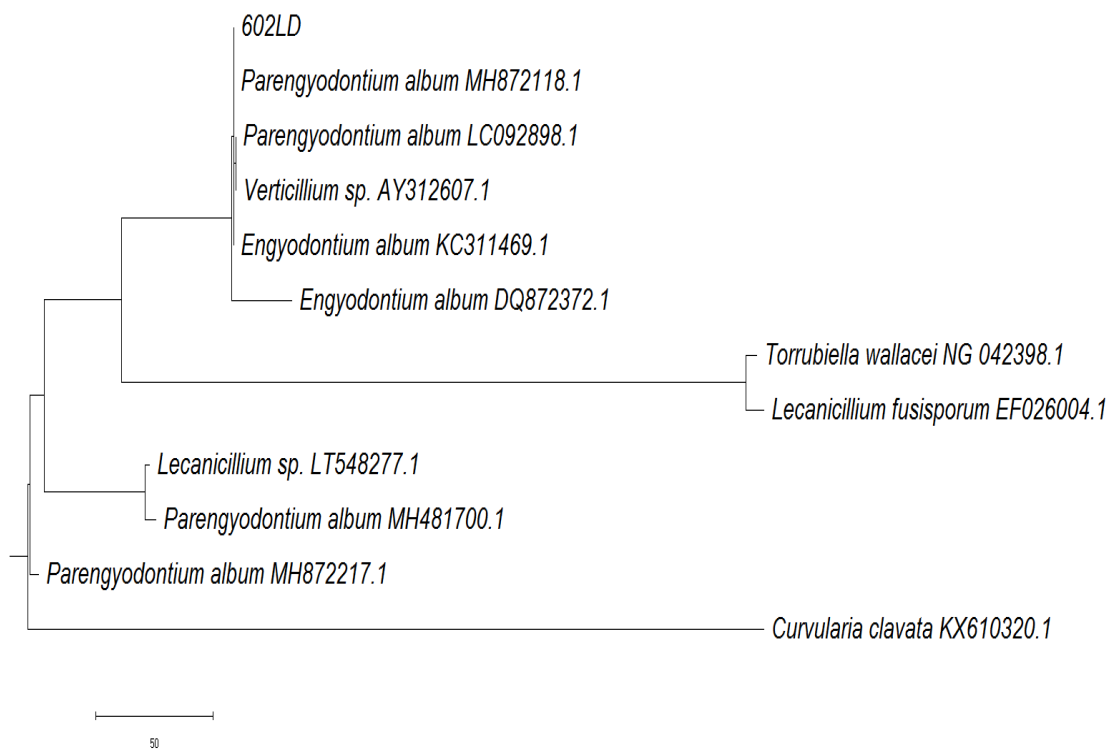

(i)

**Figure S1.** (a) Phylogenetic tree showing the relationship between *Aspergillus* spp. and the related selected sequences based on 28S LrDNA sequence comparisons. (b) Phylogenetic tree showing the relationship between *Aspergillus iizukae* EAN605 and the related selected sequences based on 28S LrDNA sequence comparisons. (c) Phylogenetic tree showing the relationship between *Penicillium* spp. and the related selected sequences based on 28S LrDNA sequence comparisons. (d) Phylogenetic tree showing the relationship between *Trichoderma* spp. and the related selected sequences based on 28S LrDNA sequence comparisons. (e) Phylogenetic tree showing the relationship between *Schizophyllum commune* 104LD and the related selected sequences based on 28S LrDNA sequence comparisons. (f) Phylogenetic tree showing the relationship between *Paraconiothyrium* sp. 202UTHM and the related selected sequences based on 28S LrDNA sequence comparisons. (g) Phylogenetic tree showing the relationship between *Purpureocillium lilacinum* EAN601 and the related selected sequences based on 28S LrDNA sequence comparisons. (h) Phylogenetic tree showing the relationship between *Cochliobolus geniculatus* 403UTHM and the related selected sequences based on 28S LrDNA sequence comparisons. (i) Phylogenetic tree showing the relationship between *Parengyodontium album* EAN602 and the related selected sequences based on 28S LrDNA sequence comparisons

**Table S1** Fungal strains, their accession no. and culture characteristics on different culture media after 7 days at 28±2°C and 37°C, (±SD represent the standard division from the mean, n=3 measurements)

| Isolate No. | Fungal strain                       | Accession No.   |                 | Media type | Colony diameter (mm) |         | Sporulation | spore size (µm) * | First time recorded in Malaysia |
|-------------|-------------------------------------|-----------------|-----------------|------------|----------------------|---------|-------------|-------------------|---------------------------------|
|             |                                     | 28 LrDNA        | ITS             |            | at 28°C              | at 37°C |             |                   |                                 |
| EAN506      | <i>Aspergillus aculeatus</i>        | <u>MK518351</u> | <u>MK518394</u> | V8A        | 80±0.0               |         | ++          | 1.45-4.02         | ×                               |
|             |                                     |                 |                 | CZ         | 80±0.0               |         | +++         |                   |                                 |
|             |                                     |                 |                 | CYA        | 50±5.8               | 40±3.9  | ++          |                   |                                 |
|             |                                     |                 |                 | MEA        | 50±6.8               |         | ++          |                   |                                 |
|             |                                     |                 |                 | PDA        | 35±2.5               |         | +++         |                   |                                 |
|             |                                     |                 |                 | SDA        | 29±7.4               | 25±6.6  | +++         |                   |                                 |
|             |                                     |                 |                 | SDA (4%)   | 65±11.2              |         | ++++        |                   |                                 |
|             |                                     |                 |                 | DCZ        | 37±4.8               |         | +++         |                   |                                 |
|             |                                     |                 |                 | EVA        | 80±0.0               |         | ++++        |                   |                                 |
|             |                                     |                 |                 | V8A        | 9±0.8                |         | -           |                   |                                 |
| EAN603      | <i>Aspergillus arenarioides</i>     | <u>MK518366</u> | ND              | CZ         | 11±0.6               |         | +           | 1.6-4.3           | √                               |
|             |                                     |                 |                 | CYA        | 12±0.6               | 0       | +           |                   |                                 |
|             |                                     |                 |                 | MEA        | 21±0.4               |         | -           |                   |                                 |
|             |                                     |                 |                 | PDA        | 8±0.3                |         | +           |                   |                                 |
|             |                                     |                 |                 | SDA        | 12±0.5               | 0       | +           |                   |                                 |
|             |                                     |                 |                 | SDA (4%)   | 10±0.8               |         | -           |                   |                                 |
|             |                                     |                 |                 | DCZ        | 12±1.2               |         | +           |                   |                                 |
|             |                                     |                 |                 | EVA        | 19±1.4               |         | +           |                   |                                 |
|             |                                     |                 |                 | V8A        | 25±2.8               |         | ++          |                   |                                 |
|             |                                     |                 |                 | CZ         | 28±2.8               |         | +++         |                   |                                 |
| EAN605      | <i>Aspergillus izukae</i><br>EAN605 | <u>MK518343</u> | ND              | CYA        | 32±8.5               | 10±1.4  | ++++        | 2.6-4.1           | √                               |
|             |                                     |                 |                 | MEA        | 29±5.8               |         | ++          |                   |                                 |
|             |                                     |                 |                 | PDA        | 24±7.9               |         | +++         |                   |                                 |
|             |                                     |                 |                 | SDA        | 33±5.2               | 18±0.3  | ++          |                   |                                 |
|             |                                     |                 |                 | SDA (4%)   | 27±1.2               |         | +++         |                   |                                 |
|             |                                     |                 |                 | DCZ        | 23±1.8               |         | ++          |                   |                                 |
|             |                                     |                 |                 | EVA        | 31±2.4               |         | +++         |                   |                                 |
|             |                                     |                 |                 | V8A        | 27±1.8               |         | ++          |                   |                                 |
|             |                                     |                 |                 | CZ         | 28±4.8               |         | ++          |                   |                                 |
|             |                                     |                 |                 | CYA        | 40±4.5               | 17±0.8  | ++          |                   |                                 |
| EAN203      | <i>Penicillium verruculosum</i>     | <u>MK518350</u> | ND              | MEA        | 45±6.3               |         | +++         | 1.65-3.25         | ×                               |
|             |                                     |                 |                 | PDA        | 38±3.2               |         | ++          |                   |                                 |
|             |                                     |                 |                 | SDA        | 40±9.2               | 15±0.6  | ++          |                   |                                 |
|             |                                     |                 |                 | SDA (4%)   | 37±8.5               |         | ++          |                   |                                 |
|             |                                     |                 |                 | DCZ        | 17±1.74              |         | +           |                   |                                 |
|             |                                     |                 |                 | EVA        | 28±2.8               |         | +++         |                   |                                 |



(Cont.)

| Isolate No. | Fungal strain                  | Accession No.   |                 | Media type | Colony diameter (mm) |         | Sporulation | Spore size (µm)* | First time recorded in Malaysia |
|-------------|--------------------------------|-----------------|-----------------|------------|----------------------|---------|-------------|------------------|---------------------------------|
|             |                                | 28 LrDNA        | ITS             |            | at 28°C              | at 37°C |             |                  |                                 |
| EFAQ406     | <i>Penicillium crustosum</i>   | ND              | <u>MK530088</u> | V8A        | 30±8.3               |         | ++          | 2.47-4.29        | ×                               |
|             |                                |                 |                 | CZ         | 21±6.3               |         | +           |                  |                                 |
|             |                                |                 |                 | CYA        | 20±1.8               | 0       | ++          |                  |                                 |
|             |                                |                 |                 | MEA        | 24±7.9               |         | ++          |                  |                                 |
|             |                                |                 |                 | PDA        | 23±2.3               |         | ++          |                  |                                 |
|             |                                |                 |                 | SDA        | 14±5.2               | 0       | +++         |                  |                                 |
|             |                                |                 |                 | SDA (4%)   | 16±0.6               |         | ++          |                  |                                 |
|             |                                |                 |                 | DCZ        | 18±2.2               |         | +++         |                  |                                 |
|             |                                |                 |                 | EVA        | 12±3.1               |         | ++          |                  |                                 |
|             |                                |                 |                 | V8A        | 59±7.3               |         | ++++        | 1.66-3.33        | √                               |
| EAN604      | <i>Penicillium pedemalense</i> | <u>MK518385</u> | ND              | CZ         | 25±7.7               |         | ++          |                  |                                 |
|             |                                |                 |                 | CYA        | 46±1.8               | 0       | +++         |                  |                                 |
|             |                                |                 |                 | MEA        | 21±6.6               |         | ++          |                  |                                 |
|             |                                |                 |                 | PDA        | 24±2.9               |         | +++         |                  |                                 |
|             |                                |                 |                 | SDA        | 34±9.5               | 0       | +++         |                  |                                 |
|             |                                |                 |                 | SDA (4%)   | 18±3.8               |         | ++          |                  |                                 |
|             |                                |                 |                 | DCZ        | 13±2.2               |         | +           |                  |                                 |
|             |                                |                 |                 | EVA        | 30±1.8               |         | +++         |                  |                                 |
|             |                                |                 |                 | V8A        | 24±4.8               |         | ++          | 3.05-5.54        | ×                               |
|             |                                |                 |                 | CZ         | 19.6±2.8             |         | +           |                  |                                 |
| EFAQ405     | <i>Penicillium crustosum</i>   | <u>MK530708</u> | <u>MK530709</u> | CYA        | 24±4.5               | 0       | ++          |                  |                                 |
|             |                                |                 |                 | MEA        | 20±2.5               |         | ++          |                  |                                 |
|             |                                |                 |                 | PDA        | 25±2.5               |         | ++          |                  |                                 |
|             |                                |                 |                 | SDA        | 22±1.7               | 0       | ++          |                  |                                 |
|             |                                |                 |                 | SDA (4%)   | 15±1.9               |         | +           |                  |                                 |
|             |                                |                 |                 | DCZ        | 17±1.2               |         | ++          |                  |                                 |
|             |                                |                 |                 | EVA        | 23±1.8               |         | ++          |                  |                                 |

(Cont.)

| Isolate No. | Fungal strain                       | Accession No.   |                 | Media type | Colony diameter (mm) |         | Sporulation | Spore size (µm)* | First time recorded in Malaysia |
|-------------|-------------------------------------|-----------------|-----------------|------------|----------------------|---------|-------------|------------------|---------------------------------|
|             |                                     | 28 LrDNA        | ITS             |            | at 28°C              | at 37°C |             |                  |                                 |
| 102UTHM     | <i>Trichoderma viride</i>           | <u>MK518057</u> | ND              | V8A        | 80±0.0               |         | ++++        | 2.0-4.4          | ×                               |
|             |                                     |                 |                 | CZ         | 80±0.0               |         | ++++        |                  |                                 |
|             |                                     |                 |                 | CYA        | 80±0.0               | 0       | ++++        |                  |                                 |
|             |                                     |                 |                 | MEA        | 80±0.0               |         | ++++        |                  |                                 |
|             |                                     |                 |                 | PDA        | 80±0.0               |         | ++++        |                  |                                 |
|             |                                     |                 |                 | SDA        | 80±0.0               | 0       | ++++        |                  |                                 |
|             |                                     |                 |                 | SDA (4%)   | 80±0.0               |         | ++++        |                  |                                 |
|             |                                     |                 |                 | DCZ        | 80±0.0               |         | ++++        |                  |                                 |
|             |                                     |                 |                 | EVA        | 80±0.0               |         | ++++        |                  |                                 |
|             |                                     |                 |                 | V8A        | 80±0.0               |         | ++++        |                  |                                 |
| 303UTHM     | <i>Trichoderma asperellum</i>       | <u>MK518056</u> | ND              | CZ         | 80±0.0               |         | ++++        | 2.2- 3.8         | ×                               |
|             |                                     |                 |                 | CYA        | 80±0.0               | 0       | ++++        |                  |                                 |
|             |                                     |                 |                 | MEA        | 80±0.0               |         | ++++        |                  |                                 |
|             |                                     |                 |                 | PDA        | 80±0.0               |         | ++++        |                  |                                 |
|             |                                     |                 |                 | SDA        | 80±0.0               | 0       | ++++        |                  |                                 |
|             |                                     |                 |                 | SDA (4%)   | 80±0.0               |         | ++++        |                  |                                 |
|             |                                     |                 |                 | DCZ        | 80±0.0               |         | ++++        |                  |                                 |
|             |                                     |                 |                 | EVA        | 80±0.0               |         | ++++        |                  |                                 |
|             |                                     |                 |                 | V8A        | 36±7.8               |         | ++          |                  |                                 |
|             |                                     |                 |                 | CZ         | 30±7.9               |         | +++         |                  |                                 |
| EAN601      | <i>Purpureocillium lilacinum</i>    | <u>MK518365</u> | ND              | CYA        | 31±4.2               | 0       | ++          | 1.65- 2.01       | √                               |
|             |                                     |                 |                 | MEA        | 25±5.8               |         | ++          |                  |                                 |
|             |                                     |                 |                 | PDA        | 17±2.8               |         | +           |                  |                                 |
|             |                                     |                 |                 | SDA        | 24±4.6               | 0       | ++          |                  |                                 |
|             |                                     |                 |                 | SDA (4%)   | 30±2.3               |         | +++         |                  |                                 |
|             |                                     |                 |                 | DCZ        | 9±0.65               |         | +           |                  |                                 |
|             |                                     |                 |                 | EVA        | 28±3.0               |         | +++         |                  |                                 |
|             |                                     |                 |                 | V8A        | 39±4.9               |         | +           |                  |                                 |
|             |                                     |                 |                 | CZ         | 26±9.5               |         | -           |                  |                                 |
|             |                                     |                 |                 | CYA        | 19±6.5               | 0       | -           |                  |                                 |
| EAN202      | <i>Paraconiothyrium brasiliense</i> | <u>MK517572</u> | <u>MK518445</u> | MEA        | 23±7.8               |         | +           | ND               | √                               |
|             |                                     |                 |                 | PDA        | 21±2.2               |         | -           |                  |                                 |
|             |                                     |                 |                 | SDA        | 23±5.7               | 0       | +           |                  |                                 |
|             |                                     |                 |                 | SDA (4%)   | 9±0.7                |         | -           |                  |                                 |
|             |                                     |                 |                 | DCZ        | 25±2.4               |         | -           |                  |                                 |
|             |                                     |                 |                 | EVA        | 18±1.4               |         | -           |                  |                                 |

(Cont.)

| Isolate No. | Fungal strain                   | Accession No.   |                 | Media type    | Colony diameter (mm) |         | Sporulation | Spore size (µm)* | First time recorded in Malaysia |
|-------------|---------------------------------|-----------------|-----------------|---------------|----------------------|---------|-------------|------------------|---------------------------------|
|             |                                 | 28 LrDNA        | ITS             |               | at 28°C              | at 37°C |             |                  |                                 |
| EAN403      | <i>Cochliobolus geniculatus</i> | <u>MK517569</u> | <u>MK518444</u> | V8A           | 63±4.9               |         | +++         | ND               | ×                               |
|             |                                 |                 |                 | CZ            | 69±3.3               |         | +++         |                  |                                 |
|             |                                 |                 |                 | CYA           | 73±4.8               | 17±6.8  | +++         |                  |                                 |
|             |                                 |                 |                 | MEA           | 68±3.9               |         | +++         |                  |                                 |
|             |                                 |                 |                 | PDA           | 63±3.6               |         | +++         |                  |                                 |
|             |                                 |                 |                 | SDA           | 66±4.4               | 17±1.9  | +++         |                  |                                 |
|             |                                 |                 |                 | SDA (4%)      | 41±8.6               |         | +++         |                  |                                 |
|             |                                 |                 |                 | DCZ           | 42±2.65              |         | +++         |                  |                                 |
|             |                                 |                 |                 | EVA           | 80±0.0               |         | +++         |                  |                                 |
|             |                                 |                 |                 | PDA           | 76.76±2.3            |         | ND          | ND               | ×                               |
| 104UTHM     | <i>Schizophyllum commune</i>    | <u>MK517570</u> | ND              | CZ            | 55±1.7               |         |             |                  |                                 |
|             |                                 |                 |                 | V8            | 80±12.1              |         |             |                  |                                 |
|             |                                 |                 |                 | SDA           | 60±3.7               | 70±1.0  |             |                  |                                 |
|             |                                 |                 |                 | SDA4% sucrose | 50±3.5               |         |             |                  |                                 |
|             |                                 |                 |                 | CYA           | 50±4.9               | 67±5.3  |             |                  |                                 |
|             |                                 |                 |                 | MEA           | 73±9.1               |         |             |                  |                                 |
|             |                                 |                 |                 | DCZ           | 66±3.6               |         |             |                  |                                 |
|             |                                 |                 |                 | EVA           | 78±4.6               |         |             |                  |                                 |
|             |                                 |                 |                 | PDA           | 9±0.3                |         | ND          | ND               | √                               |
|             |                                 |                 |                 | CZ            | 8±0.4                |         |             |                  |                                 |
| EAN602      | <i>Parengyodontium album</i>    | <u>MK518376</u> | ND              | V8            | 16±0.5               |         |             |                  |                                 |
|             |                                 |                 |                 | SDA           | 9±0.6                | 0       |             |                  |                                 |
|             |                                 |                 |                 | SDA4%         | 9±0.7                |         |             |                  |                                 |
|             |                                 |                 |                 | CYA           | 13±0.8               | 0       |             |                  |                                 |
|             |                                 |                 |                 | MEA           | 8±0.3                |         |             |                  |                                 |
|             |                                 |                 |                 | DCZ           | 13±1.0               |         |             |                  |                                 |
|             |                                 |                 |                 | EVA           | 70±3.6               |         |             |                  |                                 |
|             |                                 |                 |                 | V8A           | 71±7.4               |         | ++++        | 7.95-            | ×                               |
|             |                                 |                 |                 | CZ            | 66±4.8               |         | ++++        | 26.17            |                                 |
|             |                                 |                 |                 | CYA           | 67±3.9               | 5±0.6   | ++++        |                  |                                 |
| EFAQ504     | <i>Fusarium solani</i>          | NDf569          | <u>MK530101</u> | MEA           | 63±8.2               |         | ++++        |                  |                                 |
|             |                                 |                 |                 | PDA           | 65±3.2               |         | ++++        |                  |                                 |
|             |                                 |                 |                 | SDA           | 56±5.9               |         | ++++        |                  |                                 |
|             |                                 |                 |                 | SDA (4%)      | 63±6.6               | 8±0.6   | ++++        |                  |                                 |
|             |                                 |                 |                 | DCZ           | 60±3.3               |         | ++++        |                  |                                 |
|             |                                 |                 |                 | EVA           | 68±2.7               |         | ++++        |                  |                                 |
|             |                                 |                 |                 |               |                      |         |             |                  |                                 |
|             |                                 |                 |                 |               |                      |         |             |                  |                                 |

Potato Dextrose Agar (PDA), V8 juice agar medium (V8A), Malt Extract Agar (MEA), Czapek Yeast Extract Agar (CYA), Czapek-Dox Agar (CZ), Sabouraud dextrose agar (SDA), CZ medium with rose bengal (CZR); PKM (EVA) Pumpkin peels medium; √(Yes); × (No); \*As determined using light microscope with 100X; ND (non-detected); - (no sporulation was observed); + (low sporulation); ++ (Moderate sporulation); +++ (high sporulation); ++++ (very high sporulation)

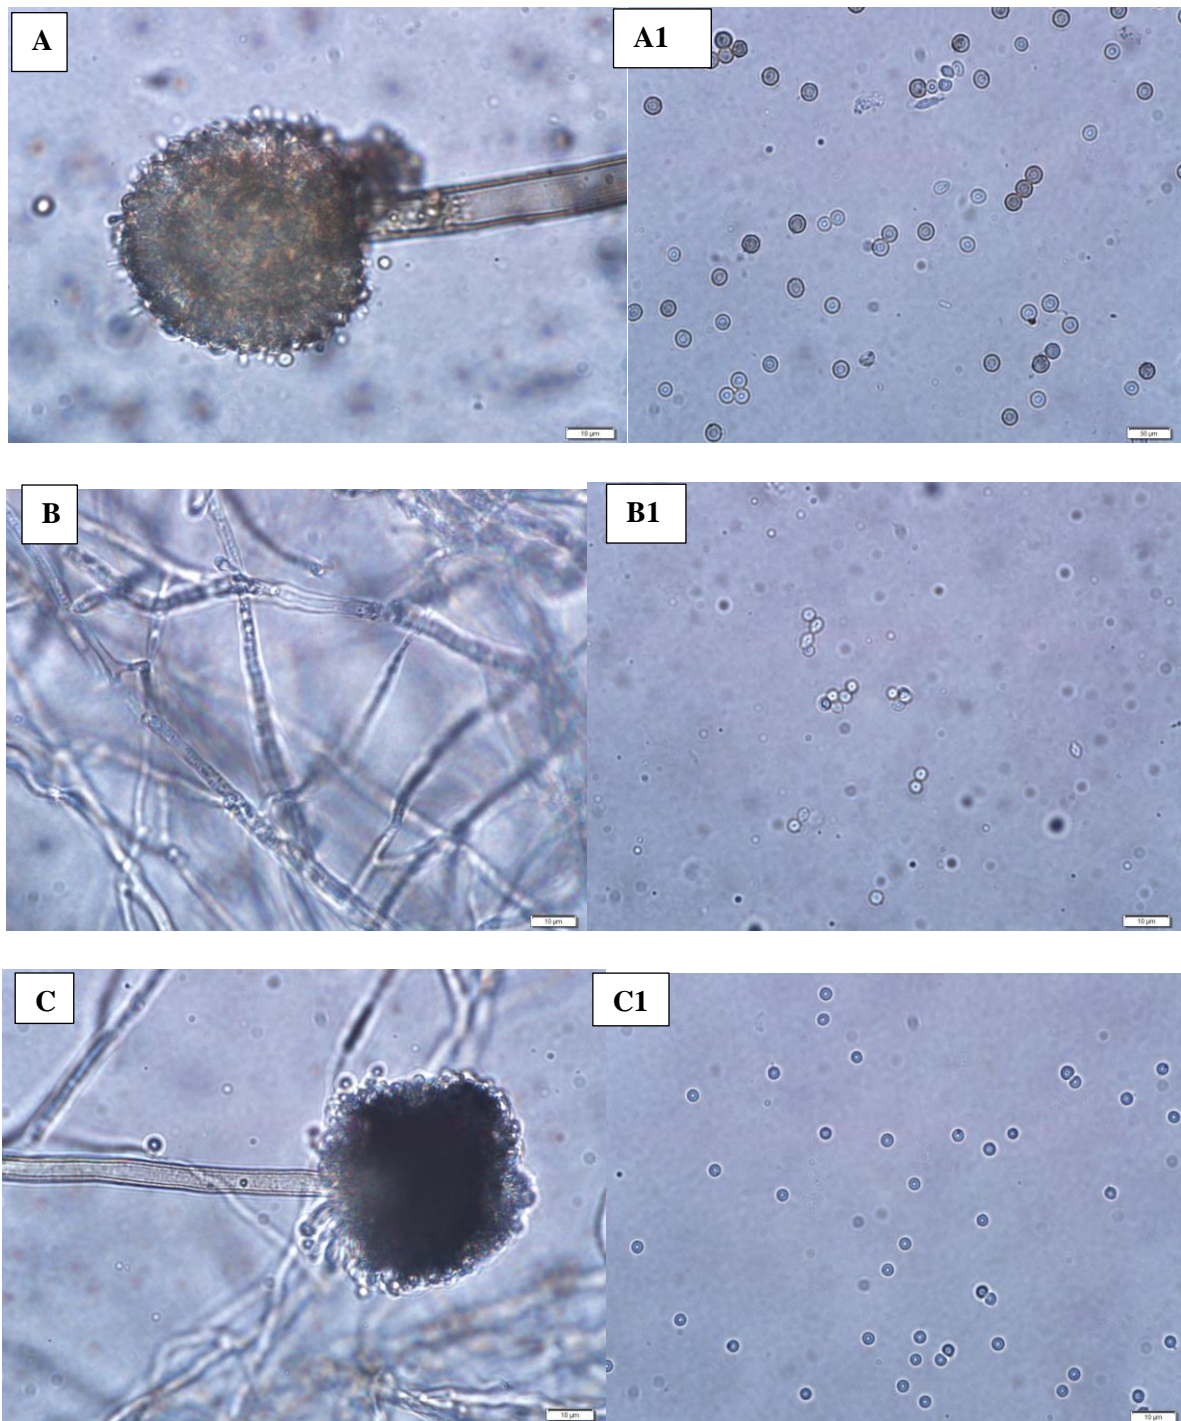

Figure S2: Scanning electron micrographs of fungal strains from peatland; A) *A. aculeatus* EAN506 conidiophore; A1) spores; B) *A. arenarioides* EAN603 conidiophore; B1) spores; (C) *A. iizukae* EAN605 conidiophore; (B) spores

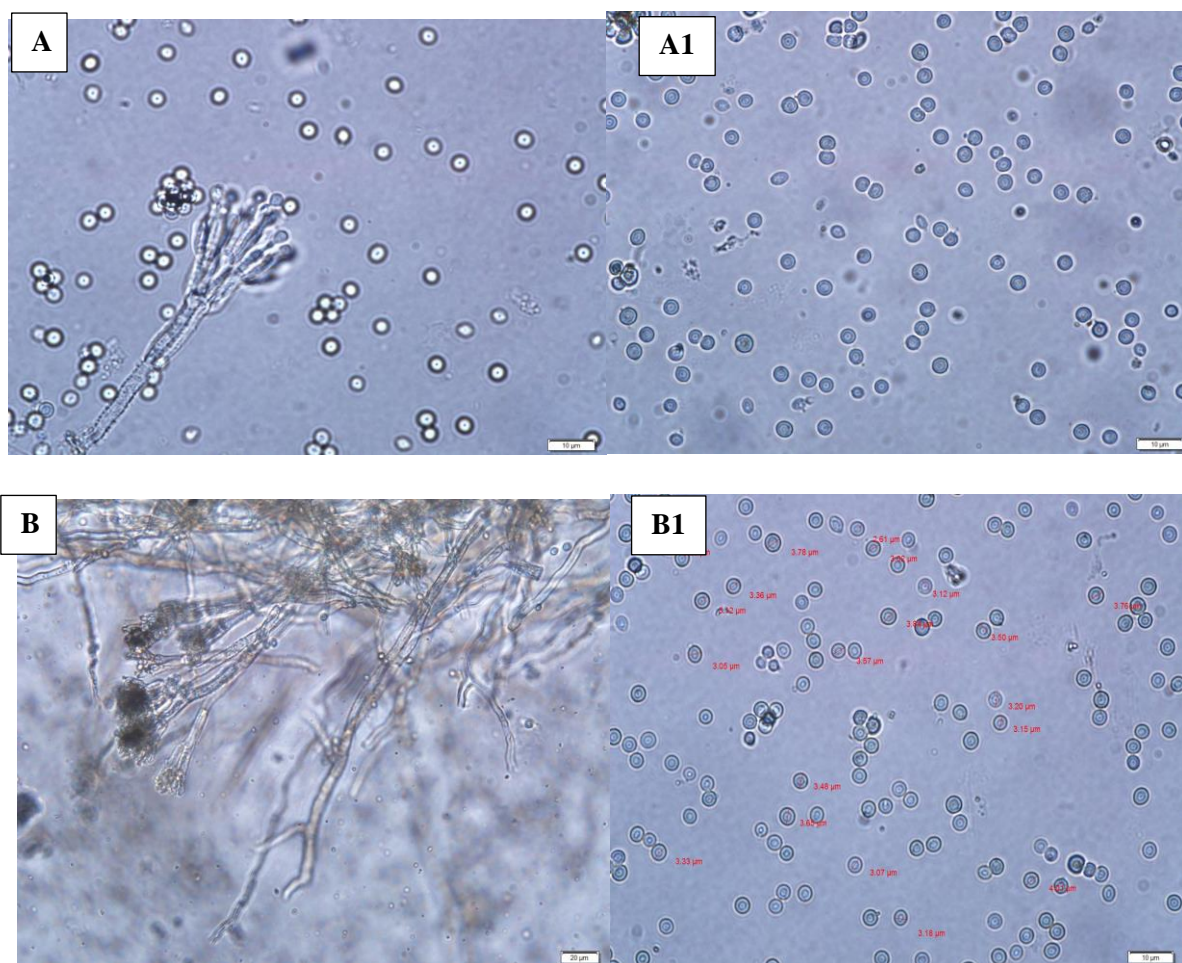

Figure S3: Scanning electron micrographs of fungal strains from peatland; A) *P. crustosum* 405EFAQ conidiophore; A1) spores; B) *P. crustosum* 406EFAQ conidiophore; B1) spores



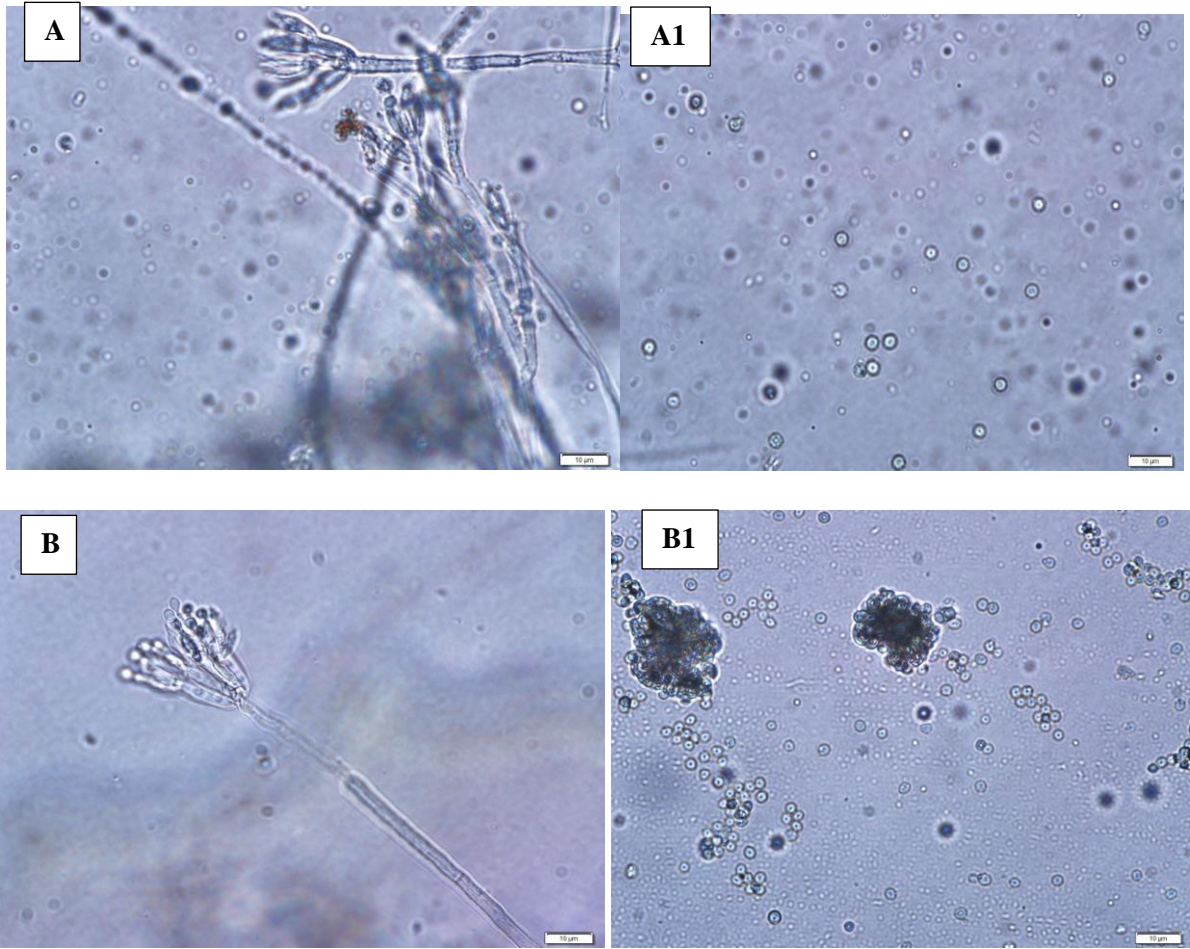

Figure S4: Scanning electron micrographs of fungal strains from peatland; A) *P. verruculosum* EAN203 conidiophore; A1) spores; B) *P. pedernalense* EAN604 conidiophore; B1) spores





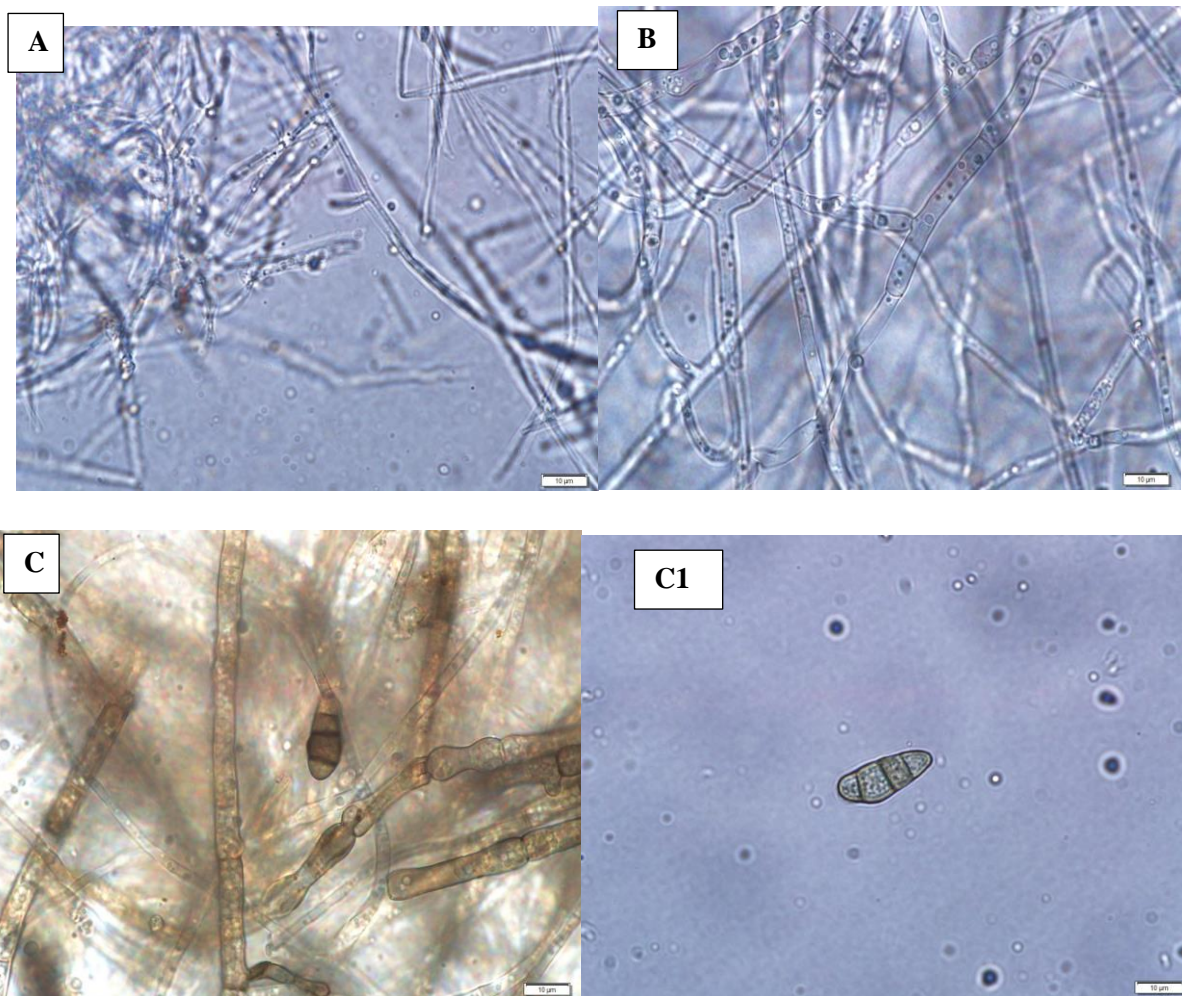

Figure S6: Scanning electron micrographs of fungal strains from peatland A) *P. album* EAN602; B) *P. brasiliense* EAN202; C) *C. geniculatus* EAN403; C1) spores



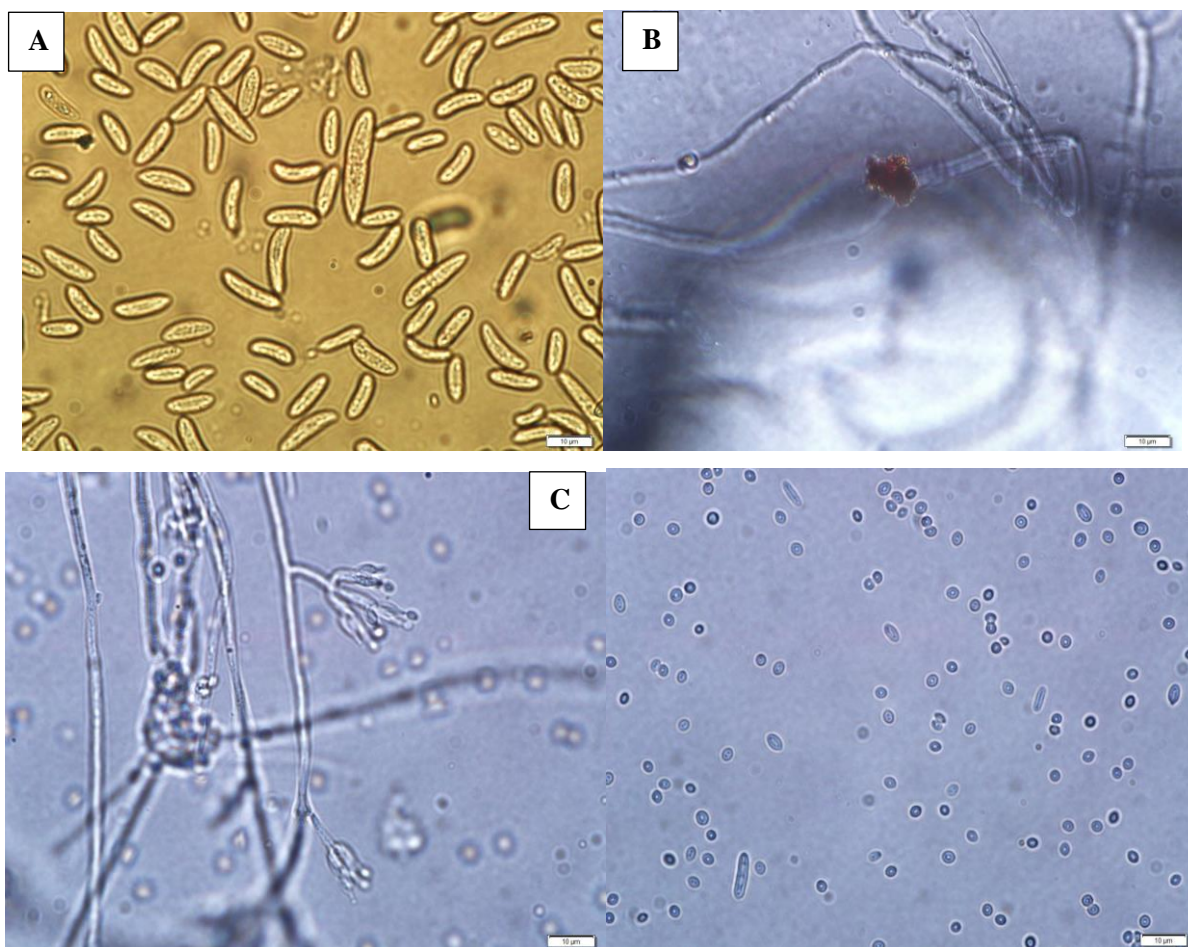

Figure S7: Scanning electron micrographs of fungal strains from peatland; A) *F. solani* EFAQ504; B) *P. lilacinum* EAN601; C) *S. commune* 104UTHM
